# Supplementary material
Source: Springer Nature journal article supplement (https://www.springermedizin.de/resource/supplementary/12889_2009_2367_MOESM5_ESM.pdf/9485556)

Type of outcome

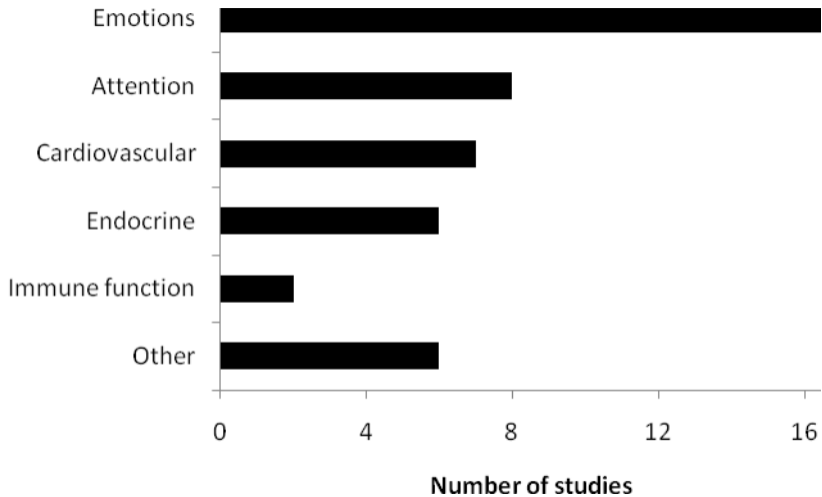

Supplement: MOESM5 [file 9485556]
